# Supplementary material for: Genome-Wide Identification of Mango (Mangifera indica L.) Polygalacturonases: Expression Analysis of Family Members and Total Enzyme Activity During Fruit Ripening
Source: PubMed Central journal article supplement (PMC6682704; doi:10.3389/fpls.2019.00969), 2019-07-30
Supplement: Image_2.pdf [file Image_2.pdf]

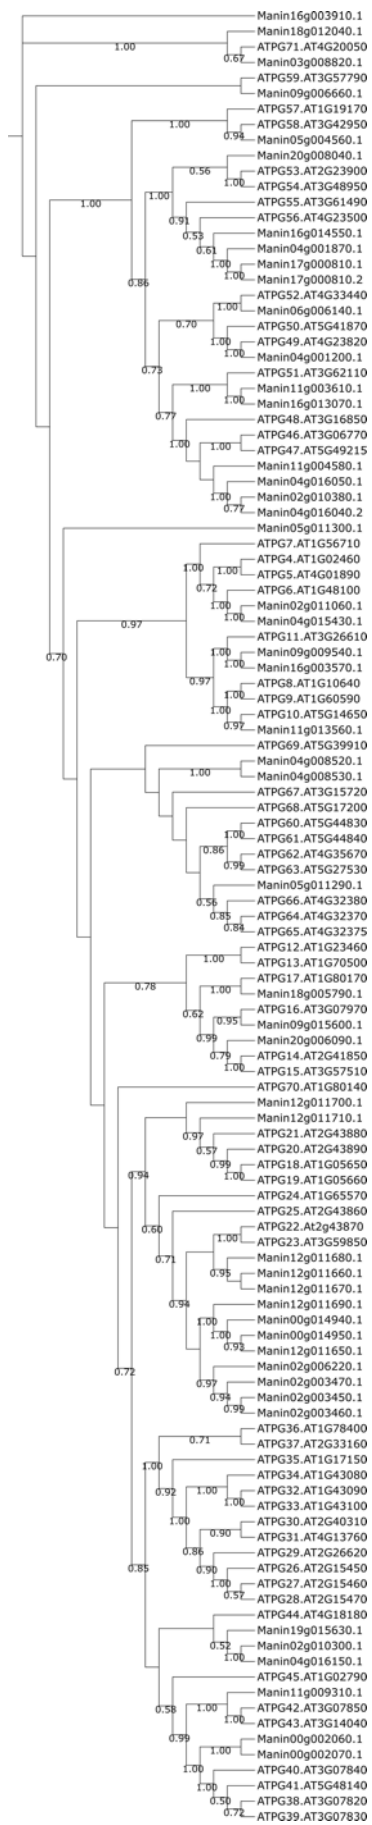

**Supplementary Figure S2.** Phylogenetic analysis of *Mangifera indica* L. and *Arabidopsis thaliana* polygalacturonases. The evolutionary history was inferred using the Neighbor-Joining method, while distances were computed using the Poisson correction method. The analysis involved 117 amino acid sequences, of which 48 sequences belong to mango (*MiPGs*). Taxa clustered together in the bootstrap test (2000 replicates). Evolutionary analyses were conducted in MEGA X.
