# Supplementary material for: Genome-Wide Identification of Mango (Mangifera indica L.) Polygalacturonases: Expression Analysis of Family Members and Total Enzyme Activity During Fruit Ripening
Source: PubMed Central journal article supplement (PMC6682704; doi:10.3389/fpls.2019.00969), 2019-07-30
Supplement: Image_3.pdf [file Image_3.pdf]

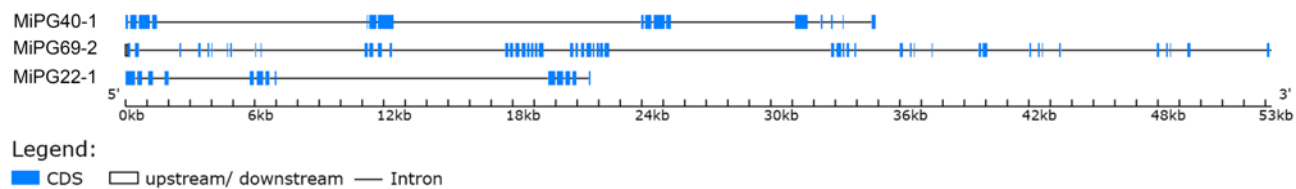

**Supplementary Figure S3.** Gene structure of the longest mango PG genes including exon/intron configuration. *MiPG40-1* contains 16 exons, *MiPG69-2* contains 51 exons and *MiPG22-1* has 13 exons. *MiPG40-1* encodes an enzyme of 1420 aa, *MiPG69-2* and enzyme of 1916 aa and *MiPG22-1* an enzyme of 983 aa long. The structure of the introns and exons of the *MiPG* genes were obtained using GSDS 2.0 (<http://gsds.cbi.pku.edu.cn/>).
