# Supplementary material for: Genome-Wide Identification of Mango (Mangifera indica L.) Polygalacturonases: Expression Analysis of Family Members and Total Enzyme Activity During Fruit Ripening
Source: PubMed Central journal article supplement (PMC6682704; doi:10.3389/fpls.2019.00969), 2019-07-30
Supplement: Image_4.pdf [file Image_4.pdf]

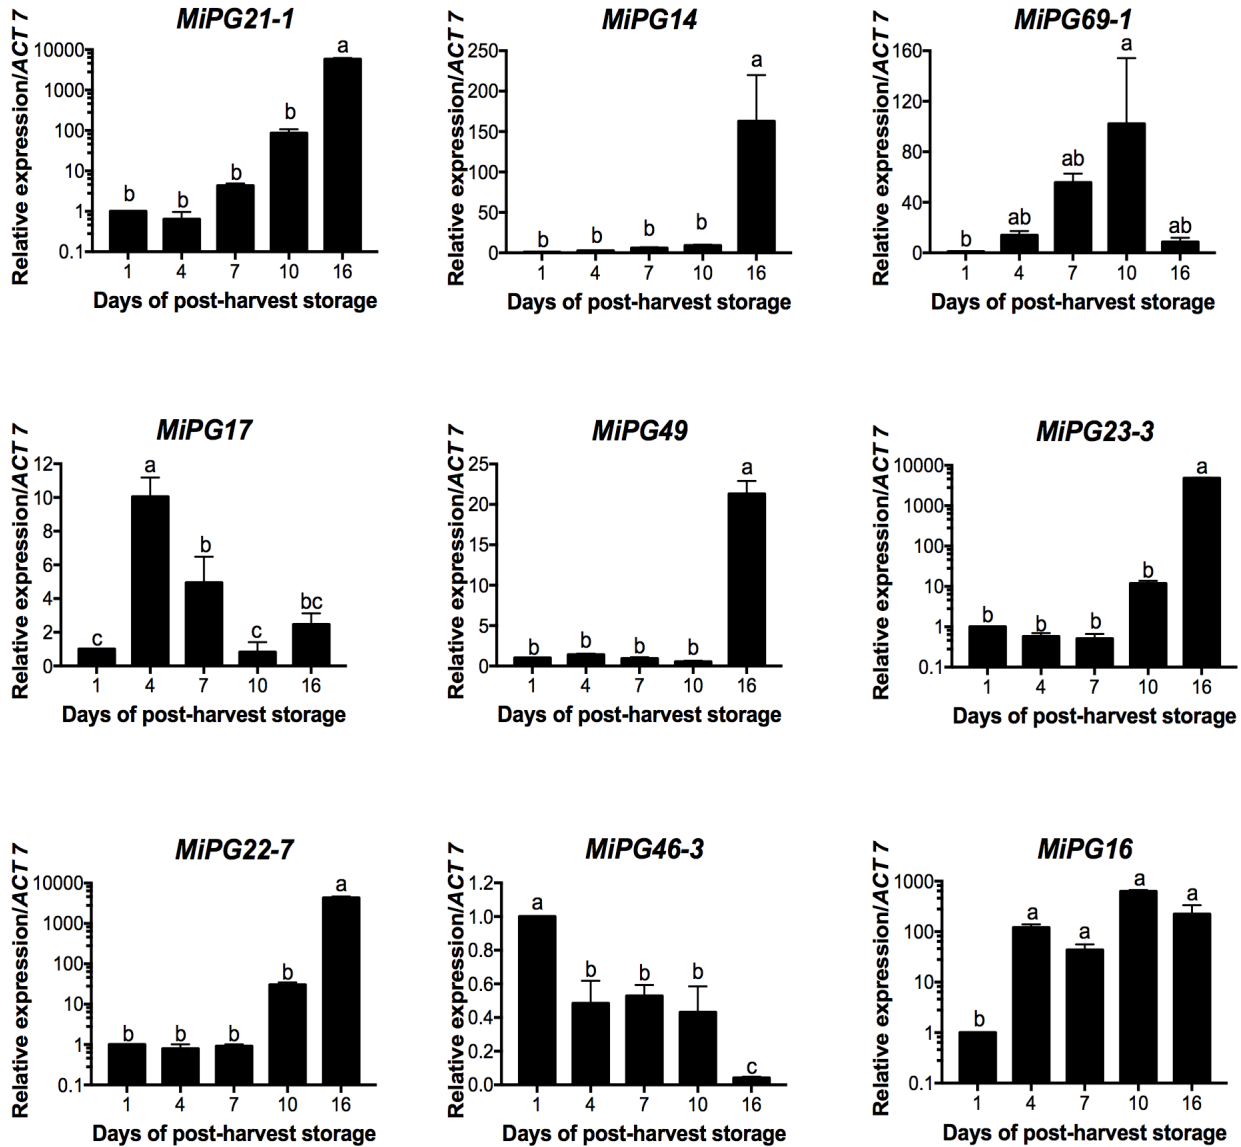

**Supplementary Figure 4.** Relative expression of *MiPG21-1*, *MiPG14*, *MiPG69-1*, *MiPG17*, *MiPG49*, *MiPG23-3*, *MiPG22-7*, *MiPG46-3* and *MiPG16* in mango mesocarp, using *ACT 7* as reference gene. Data of the nine genes represent the average of three biological replicates ( $n=3$ ) with three experimental replicates each. Error bars indicate SE of the means and different letters indicate significant differences. Statistical significance of differences between days of postharvest storage was determined by one-way ANOVA with the Fisher test ( $P<0.05$ ).
