# Supplementary material for: Genome-Wide Identification of Mango (Mangifera indica L.) Polygalacturonases: Expression Analysis of Family Members and Total Enzyme Activity During Fruit Ripening
Source: PubMed Central journal article supplement (PMC6682704; doi:10.3389/fpls.2019.00969), 2019-07-30
Supplement: Image_5.pdf [file Image_5.pdf]

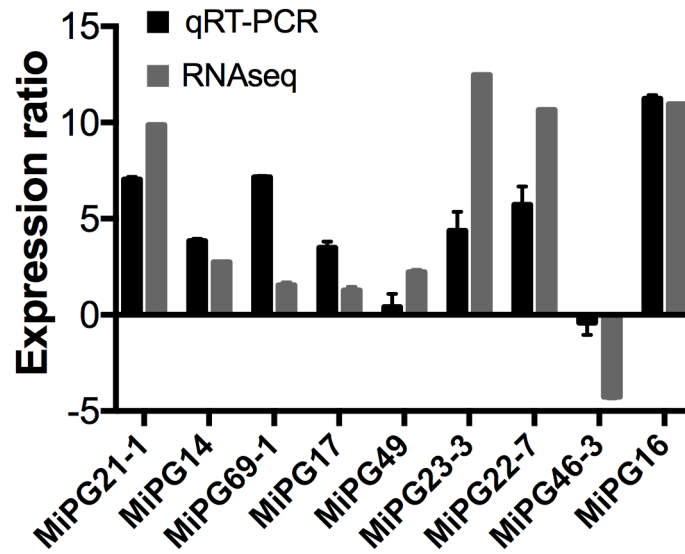

**Supplementary Figure 5.** Expression ratio (Log<sub>2</sub>) for the 9 polygalacturonases was obtained by RNA-seq and qPCR. *GAPDH* was the constitutive gene used for normalization of qPCR data. Bars represent the standard error (n=3).
